# Supplementary figures and images for: Exposure to Antineoplastic Drugs in Occupational Settings: A Systematic Review of Biological Monitoring Data
Source: MDPI journal article supplement (doi:10.3390/ijerph19063737), 2022-03-21

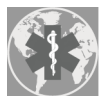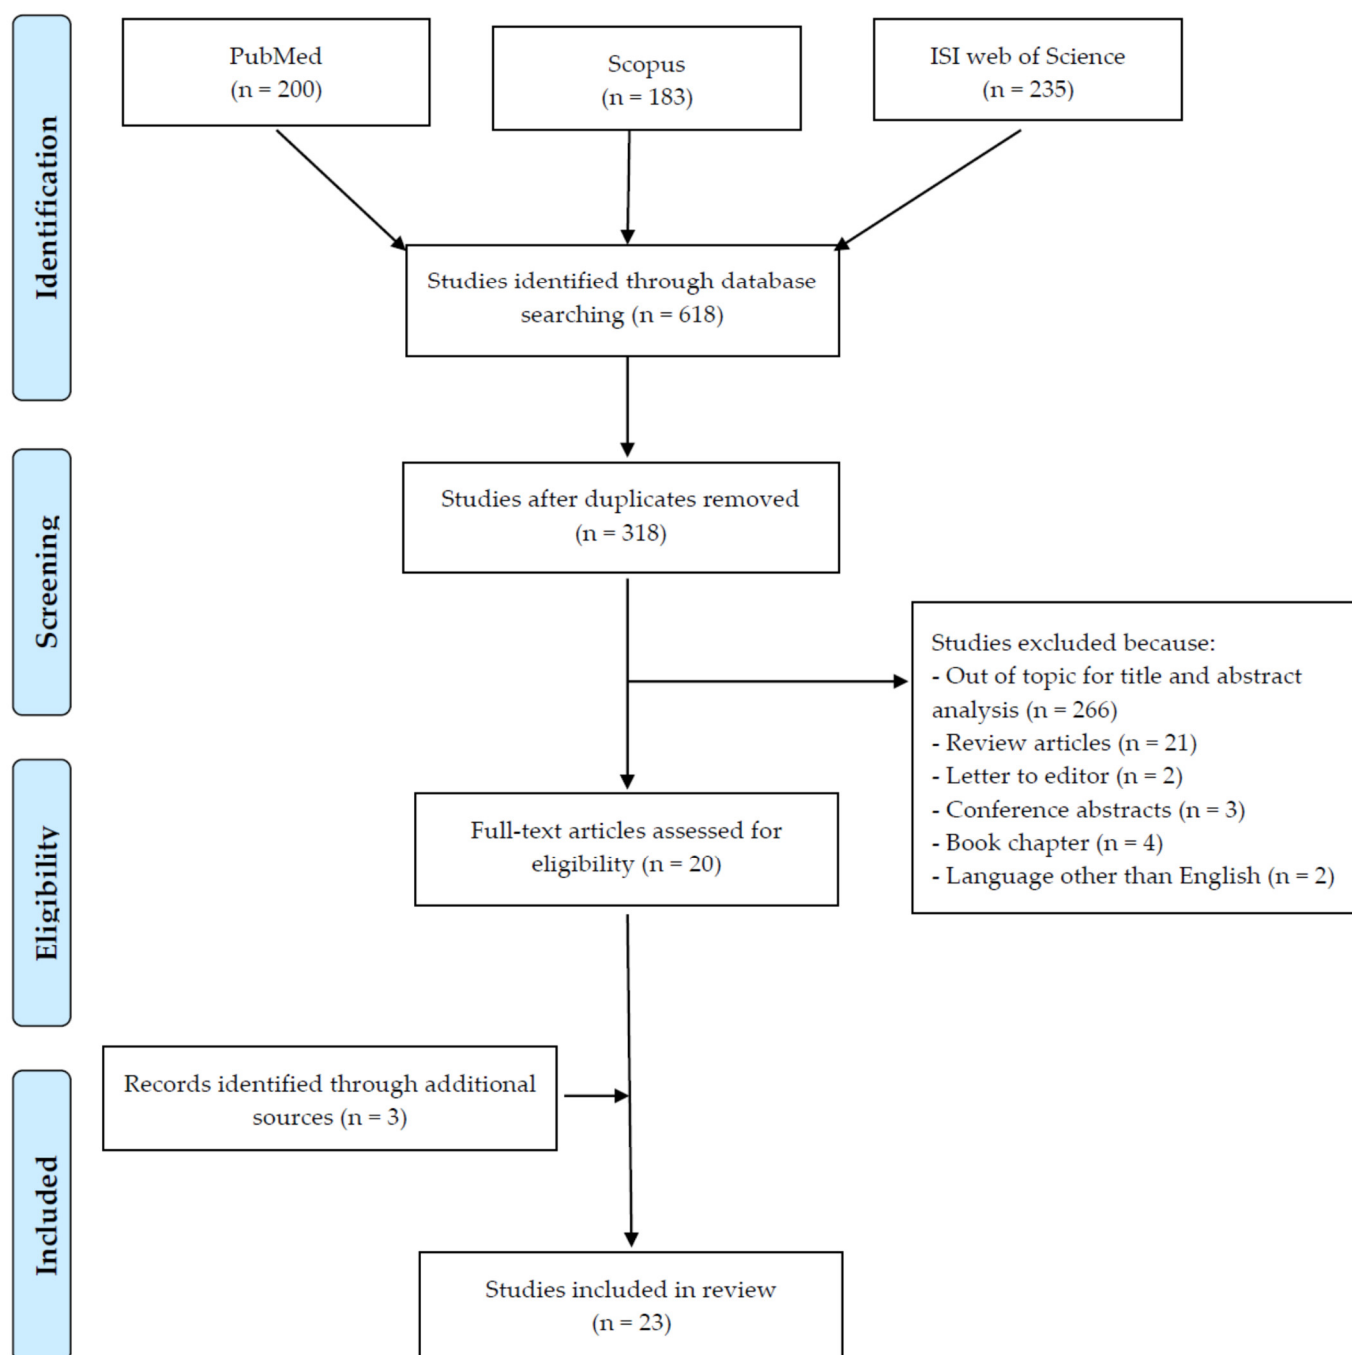

**Figure S1.** Flow diagram of literature search.

Supplement: s1 [file s1]
